**Sporulation efficiency and spore quality in a human intestinal  
isolate of *Bacillus cereus***

Maria Vittoria<sup>a†</sup>, Anella Saggese<sup>a†</sup>, Giovanni Di Gregorio Barletta<sup>a</sup>, Stefany Castaldi<sup>a</sup>,

Rachele Isticato<sup>a</sup>, Loredana Baccigalupi<sup>b</sup> and Ezio Ricca<sup>a\*</sup>

<sup>a</sup>Department of Biology, and <sup>b</sup>Department of Molecular Medicine and Medical Biotechnology,  
Federico II University of Naples, Italy.

† These two authors contributed equally

\* For correspondence: Ezio Ricca  
Department of Biology, Federico II University of Naples  
via Cintia - complesso MSA  
Naples 80126 Italy  
E-mail [ericca@unina.it](mailto:ericca@unina.it)  
Tel. (+39)081679036  
Fax (+39)081679233.

## 1 **Abstract**

2 The *Bacillus cereus* group is a species complex of the *Bacillus* genus that includes several closely  
3 related species. Within this group, bacteria indicated as *B. cereus sensu stricto* (*B. cereus*) are the  
4 causative agent of two different types of gastrointestinal diseases associated with food poisoning.  
5 Outbreaks of this opportunistic pathogen are generally due to the resistance of its spores to heat,  
6 pH and desiccation that makes hard their complete inactivation from food products. *B. cereus* is  
7 commonly isolated from a variety of environments, including intestinal samples of infected and  
8 healthy people. We report the genomic and physiological characterization of MV19, a human  
9 intestinal strain closely related (ANI value of 98.81%) to the reference strain *B. cereus* ATCC  
10 14579. MV19 cells were able to grow in a range of temperatures between 20 and 44°C. At the  
11 optimal temperature the sporulation process was induced very rapidly and mature spores efficiently  
12 released, however these appeared structurally and morphologically defective. At the sub-optimal  
13 growth temperature of 25°C sporulation was slow and less efficient but a high total number of fully  
14 functional spores was produced. Altogether, results reported here indicate that the reduced rapidity  
15 and efficiency of sporulation at 25°C are compensated by a high quality and quantity of released  
16 spores, suggesting the relevance of different performances at different growth conditions for the  
17 adaptation of this bacterium to diverse environmental niches.

18

19 **Keywords:** *Bacillus cereus*, spores, temperature, biofilm, toxins

20

## 21 **1. Introduction**

22 The *Bacillus cereus* group (*B. cereus sensu lato*) consists of several spore-forming Gram-positive  
23 bacterial species, widespread in nature as spores and vegetative cells (Liu et al., 2017; Bianco et  
24 al., 2021). The spores greatly contribute to the wide distribution of these bacteria in many  
25 environments for their resistance to extremes of temperatures and pH, to UV radiations and to the  
26 presence of lytic enzymes and toxic chemicals. The quiescent spore germinates when the  
27 environmental conditions allow cell growth and originates new vegetative cells able to grow by  
28 binary fission and eventually to sporulate again (McKenney et al., 2013).

29 The taxonomy of the *B. cereus* group is complex and rapidly evolving. Based on recent studies (Liu  
30 et al., 2017; Carrol et al., 2021), the group includes three well-characterized and several far less  
31 studied species. *B. cereus sensu stricto* (*B. cereus*), responsible for two types of foodborne  
32 intoxications, *B. thuringiensis*, an entomopathogen producing parasporal crystal inclusions made of  
33 proteins with insecticidal activity and *B. anthracis*, the agent of anthrax in humans and animals, are  
34 well-known species, genetically and physiologically characterized in details. The less studied  
35 species of the group include *B. mycoides* and *B. pseudomycoides*, forming rhizoidal colonies on  
36 solid media, the psychrotolerant *B. weihenstephanensis*, the animal probiotic *B. toyonensis*, the  
37 psychrotolerant and cytotoxic *B. wiedmannii*, the thermotolerant and occasionally pathogen *B.*  
38 *cytotoxicus* and several, recently identified other species (Liu et al., 2017; Carrol et al., 2021).

39 *B. cereus* is a major cause of foodborne outbreaks (Glasset et al., 2016) and is responsible of two  
40 types of intoxications: the emetic gastrointestinal syndrome and the diarrheal syndrome. In  
41 addition, *B. cereus* is also involved in nosocomial non-gastrointestinal infections in  
42 immunosuppressed patients (Messelhäuser and Ehling-Schulz, 2018). These are often caused by  
43 biofilm formation on biomedical devices (Lin et al., 2022) and include septicemia, meningitis, brain  
44 abscesses, gas gangrene-like infections, pneumonia, severe ocular infections and bacteremia in  
45 preterm neonates (Jovanovic et al., 2021). The severity of the diseases caused by some *B. cereus*  
46 strains makes it important to discriminate between pathogenic and non-pathogenic strains. Such  
47 discrimination is generally based on the analysis of several genetic loci that, coding for known  
48 toxins, have been selected as markers. These include the heat-resistant, emetic toxin cereulide,  
49 synthesized by a Non-Ribosomal Protein Synthase (NRPS) encoded by the *ces* gene locus, the  
50 hemolysin BL encoded by the *hbl* genes, the non-hemolytic enterotoxin encoded by the *nhe* genes  
51 and the cytotoxin K encoded by the *cytK* gene (Owusu-Kwarteng et al., 2017; Jovanovic et al.,  
52 2021).

53 Toxin-producing strains of *B. cereus* are of particular concern for public health due to their ability to  
54 form biofilms and spores (Huang et al., 2020). Both biofilm and spore formation are survival  
55 strategies for *B. cereus* in facing adverse environmental conditions. The biofilm increases both the  
56 resistance properties of cells and spores and their adhesion to surfaces, therefore playing an

57 important role in the contamination of foods, food processing and clinical equipments (Huang et al.,  
58 2020). *B. cereus* can form different types of biofilm under different growth conditions (Wijman et al.,  
59 2007) and is generally formed by proteins, carbohydrates and DNA (Wagner et al., 2009;  
60 Karunakaran and Biggs, 2011). Cells within the established biofilms can produce spores (Ryu and  
61 Beuchat, 2005; Wijman et al., 2007; Faille et al., 2014) and these have distinct properties with  
62 respect to spores derived from planktonic cells (Abee et al., 2011), appearing larger, more heat  
63 resistant and less efficient in germination (Van der Voort and Abee, 2013). The structure and the  
64 functional properties of the spore are also strongly affected by other growth and sporulation  
65 conditions such as medium composition, temperature, pH and water activity (Abee et al., 2011;  
66 Isticato et al., 2020). In *B. cereus*, that generally grows within a temperature range of 10 - 50°C  
67 with a temperature optimum between 30 and 40°C, the growth temperature influences the size and  
68 the morphology of the produced spores (Xu Zhou et al., 2017). Size and morphology, in turn,  
69 influence the functional properties of the spore with the largest ones showing the least resistance  
70 to chemicals and those surrounded by long appendages appearing more adhesive than those  
71 lacking such structures (Tauveron et al., 2006). The spore surface hydrophobicity is also affected  
72 by the growth conditions and a high hydrophobicity has been associated with a strong adhesion to  
73 surfaces (Husmark and Rönnner, 1992; Andersson et al., 1995). In the *B. cereus* type strain ATCC  
74 14579 the sporulation temperature acts on spore coat formation through the morphogenetic protein  
75 CotE, that is more abundantly represented in spores formed at 20°C than at 37°C (Bressuire-  
76 Isoard et al., 2016).

77 The aim of this study was to characterize a *B. cereus* strain isolated from a human intestinal  
78 sample. The isolate, MV19, was unambiguously assigned to the *B. cereus sensu stricto* species and  
79 the presence of the genes associated with virulence and biofilm formation analyzed by whole-  
80 genome sequencing. Analyses of the growth and sporulation temperatures, the efficiency of  
81 sporulation, the yield and quality of the produced spores at different temperatures indicated that  
82 MV19 produced fully functional spores at the sub-optimal temperature of 25°C and functionally and  
83 morphologically defective spores at the optimal temperature of 42°C. These results suggest that

84 producing different spores at different growth conditions is an important feature for the adaptation  
85 of spore formers to diverse environments.

86

## 87 **2. Materials and Methods**

### 88 **2.1 Bacterial isolation, spore production and purification**

89 Faecal samples were collected from healthy children not under antibiotic or probiotic treatment in  
90 the frame of a project aimed at collecting spore formers of the *Bacillus* genus of intestinal origin.  
91 About 1 g of a sample from a 4-year-old child was homogenized in PBS and heat-treated for 20  
92 minutes at 80°C, serially diluted, plated on Difco sporulation medium (DSM) (for 1L: 8 g/L Nutrient  
93 Broth, 1 g/L KCl, 1 mM MgSO<sub>4</sub>, 1 mM Ca(NO<sub>3</sub>)<sub>2</sub>, 10 µM MnCl<sub>2</sub>, 1 µM FeSO<sub>4</sub>, Sigma-Aldrich,  
94 Germany) and incubated overnight at 37°C, under aerobic conditions. The selected colonies were  
95 re-streaked on DSM agar plates to isolate single colonies that were then checked for the formation  
96 of phase-bright spores under the light microscope. Spores were prepared at the required  
97 temperature by the exhaustion method (Nicholson and Setlow, 1990) using liquid DSM. Before  
98 purification, spores were washed four times with cold sterile distilled water and centrifuged at 8000  
99 g for 20 minutes and then purified with ethanol as described by Zhao et al., 2008.

100

### 101 **2.2 Physiological properties of the isolated strain**

102 Hemolytic activity was assessed by spotting 5 µL of growing cells on Columbia agar plates  
103 supplemented with 5% defibrinated horse blood (Thermo Scientific), incubated for 24h at 37°C and  
104 analyzed for the presence of a lysis halo around the colony.

105 Biofilm formation was tested by growing bacterial cells in 24-well culture plates. The experiment  
106 was performed either in LB medium (10 g Bacto-Tryptone, 5g Bacto-yeast extract, 10g NaCl, pH  
107 7.0), or in S7 minimal medium (50 mM morpholine-propane-sulfonic acid (MOPS) (adjusted to pH  
108 7.0 with KOH), 10 mM (NH<sub>4</sub>)<sub>2</sub>SO<sub>4</sub>, 5 mM potassium phosphate (pH 7.0), 2 mM MgCl<sub>2</sub>, 0.9 mM  
109 CaCl<sub>2</sub>, 50 µM MnCl<sub>2</sub>, 5 µM FeCl<sub>3</sub>, 10 µM ZnCl<sub>2</sub>, 2 µM thiamine hydrochloride, 20 mM sodium  
110 glutamate, 1% glucose, 0.1 mg/mL phenylalanine, and 0.1 mg/mL tryptophan) or in DSM, for 48 h  
111 without shaking, at 25 and 42°C. Then, biofilm production was assessed by crystal violet assay as

112 previously described in [Petrillo et al., 2021](#). Data were normalized by total growth estimated by  
113  $OD_{590nm}$ , and the experiment was performed in triplicate.

114 The growth rate at different temperatures (25, 37 and 42°C) was measured by  $OD_{590nm}$  readings of  
115 cells growing in LB medium.

116

### 117 **2.3 Physiological properties of MV19 spores**

118 Spore resistance to chemical and physical treatments was tested as previously reported by  
119 [Bressuire-Isoard et al. 2016](#), with some modifications. Lysozyme resistance was tested by  
120 following changes in CFU counts on LB agar plates after 1 hour of incubation of the spores  
121 ( $1.0 \times 10^7$  CFU ml<sup>-1</sup>) with Lysozyme (7U mL<sup>-1</sup>) at 37°C.

122 Hydrogen peroxide (H<sub>2</sub>O<sub>2</sub>) resistance was tested by following changes in CFU counts on LB agar  
123 plates after 7.5 and 15 minutes of incubation of heat-activated (10 min at 70°C) spore suspension  
124 ( $1.0 \times 10^7$  CFU ml<sup>-1</sup>) in a 5% H<sub>2</sub>O<sub>2</sub> solution.

125 Similarly, 0.2 mL of heat-activated spores ( $1.0 \times 10^7$  CFU ml<sup>-1</sup>) were incubated at 90°C for 15 and  
126 30 minutes and then spores resistance to heat treatment was measured by following changes in  
127 CFU counts on LB agar plates.

128 Spore hydrophobicity was assessed by mixing 1.9-ml volume of spore suspension (0.4-0.5  
129  $OD_{590nm}$ ) in water with 0.1 ml of *n*-hexadecane and following changes in optical density at 600 nm  
130 after separation of the spores between the aqueous and apolar phases as previously reported by  
131 [Bressuire-Isoard et al. 2016](#). The ability of spores to form clumps was evaluated as described by  
132 [Cangiano et al. 2014](#).

133 Two methods were used to evaluate spore germination. Spores ( $1.0 \times 10^7$  CFU ml<sup>-1</sup>) activated at  
134 70°C for 20 minutes, were resuspended in LB medium, serially diluted and plated on LB agar  
135 plates for CFU counts. Then, the germination efficiency was assessed by flow cytometry as  
136 previously described in [Cangiano et al. 2014](#). Heat-activated spores were stained with 0.5 μM Syto  
137 16 (Life Technologies, Waltham, MA) and incubated in the dark for 15 min at 30°C.  $\lambda$  max values  
138 for the absorption and fluorescence emissions of the complex with DNA are 488 and 518 nm,  
139 respectively. Then, spores were analysed in a flow cytometer (BD Accuri C6; BD Biosciences, San

140 Jose, CA) and detected in FL1 by using the standard C6 filter configuration (FL1 =530/30 BP)  
141 separating germination-unspecific and germination-specific fluorescence (threshold  $10^4$ ) (Petrillo et  
142 al. 2020).

143 The sporulation efficiency was measured by growing cells in DSM 25 and 42°C and counting at  
144 various time points the total number of cells, sporangia, and spores under the phase-contrast  
145 microscope and measuring OD<sub>600nm</sub> at spectrophotometer. All experiments were carried out in  
146 triplicate from independently purified spores.

147

#### 148 **2.4 Whole-genome sequencing and phylogenetic analysis**

149 Exponentially growing cells were used to extract chromosomal DNA as previously reported  
150 (Cutting and Vander Horn, 1990). Genome sequencing of MV19 genome was performed by  
151 GenProbio (Parma, Italy) with Illumina MiSeq Sequencing System. Genome assembly was  
152 performed with SPAdes v3.14.0 by means of MEGAnnotator pipeline (Lugli et al., 2016). Open  
153 reading frames (ORFs) prediction was performed with RAPSearch2 against NCBI RefSeq  
154 database and HMMER against PFAM database. Ribosomal RNA genes prediction was performed  
155 with RNAmmer v1.2. Transfer RNA gene prediction was performed with tRNAscan-SE v1.21. The  
156 16S rRNA gene of the isolated strain was extracted from the sequenced genome and was  
157 compared to 22 reference 16S rRNA genes of closely related strains identified using the Genome  
158 Taxonomy Database (GTDB) taxonomy and retrieved from the NCBI database. All sequences  
159 were aligned using Seaview 5.0.5 software (Petrillo et al., 2021) and the phylogenetic tree was  
160 created using the Maximum-likelihood algorithm with model GTR+I+G4. Statistical support was  
161 evaluated by the approximate likelihood-ratio test (aLRT) and is indicated at each node in the tree.  
162 *Bacillus subtilis* subsp. *subtilis* 168 was used as an outgroup to root the tree. Average Nucleotide  
163 Identity (ANI) value between the sequenced genome and the closest bacteria was obtained using  
164 GTDB-Tk Classify - v1.6.0 toolkit (Chaumeil et al., 2019). The genome of the isolated strain has  
165 been deposited in GenBank as BioProject PRJNA846192 whose accession number is CP098734.

166

#### 167 **2.5 Whole-genome typing of MV19**

168 The presence of putative toxins and virulence factor-associated genes was evaluated by analyzing  
169 the MV19 genome by using the VF analyzer pipeline via a comparison to the Virulence Factor  
170 Database (VFDB, [Liu et al., 2019](#)). Nucleotide sequences of genes involved in biofilm formation  
171 and the proteins involved in the formation of coat and exosporium were found in NCBI program  
172 (<https://www.ncbi.nlm.nih.gov/>) and the alignments with the MV19 genome were performed using  
173 BLASTN and BLASTP, respectively.

174

## 175 **2.6 Microscopy analyses**

176 Five microliters of freshly purified spores were spotted on microscope slides and covered with  
177 coverslips and observed under phase-contrast light microscope by using an Olympus BX51  
178 microscope fitted with a 100× objective UPlanF1. Images were captured using an Olympus DP70  
179 digital camera equipped with Olympus U-CA Magnification Changer.

180 For SEM analysis, MV19 spores ( $1.0 \times 10^8$ /mL) prepared at different temperatures were cut from  
181 subapical parts using a sharp razor blade, fixed with 3% glutaraldehyde in phosphate buffer (65  
182 mM, pH 7.2–7.4) for 2 h at room temperature, post-fixed with 1% osmium tetroxide in the same  
183 phosphate buffer for 1.5 h at room temperature, and completely dehydrated with ethanol. Both  
184 samples were then mounted on aluminium stubs, coated with a thin gold film using an  
185 EdwardE306 Evaporator, and observed with a FEI (Hills-boro, OR, USA) Quanta 200 ESEM in  
186 high vacuum mode (P 70 Pa, HV 30 kV, WD10 mm, spot 3.0) ([Saggese et al. 2022](#)).

187

## 188 **3. Results and Discussion**

### 189 **3.1 Phylogenetic analysis and functional annotations of MV19 genome**

190 The general genomic features of MV19 were summarized in [Table 1](#) and [Fig. 1](#). MV19 was initially  
191 assigned to the *Bacillus cereus* group by 16S rRNA gene sequence alignment and a phylogenetic  
192 tree constructed by comparison with 22 type strains representative of the *Bacillus cereus* group  
193 ([Fig. 2](#)). Since the sequence of the 16S gene is often not sufficient to allow a correct species  
194 assignment ([Liu et al, 2015](#)), whole genome comparison was performed (by GTDB-Tk Classify -  
195 v1.6.0), and an Average Nucleotide Identity (ANI) value of 98.81% was measured with its closest



196 relative, the *Bacillus cereus* ATCC 14579 strain, therefore, allowing an unambiguous taxonomic  
197 classification as *Bacillus cereus sensu stricto* (Carrol et al., 2021).

198 Functional annotation of the MV19 genome was performed using the KO (KEGG Orthology)  
199 database using BlastKOALA tools (available at KEGG Web site <https://www.kegg.jp/>). A total of  
200 5814 protein-coding sequences, 11 rRNAs, 68 tRNAs and 1 tmRNA were assigned. As reported in  
201 [Suppl. Mat. Fig. S1A](#) Kegg analysis showed that only 45% of the annotated genes could be  
202 assigned to subsystems. Among the subsystem categories present in the genome, “genetic  
203 information processing” and “signaling and cellular processing” had the highest feature counts,  
204 followed by “carbohydrate metabolism”. The other less represented categories are reported in  
205 [Suppl. Mat. Fig. S1B](#) with their relative percentages. MV19 genome was further classified into  
206 orthologous groups based on their function (COG), by using eggNOG ([http://eggno-](http://eggno-mapper.embl.de/)  
207 [mapper.embl.de/](http://eggno-mapper.embl.de/)) ([Suppl. Mat. Fig. S2](#)). The majority of the annotated genes (1353 genes) were  
208 classified into “Function unknown” (S category in [Suppl. Mat. Fig. S2](#)), the next most represented  
209 class was “Amino acid transport and metabolism” (E category, 467 genes) followed by  
210 “Transcription” (K category, 451 genes).

211

### 212 **3.2 Genome-wide detection of toxin genes and other virulence factors in MV19**

213 Pathogenic strains of *B. cereus* are characterized by the presence of genes coding for toxins and  
214 other virulence-related factors (Owusu-Kwarteng et al., 2017; Jovanovic et al., 2021). To evaluate  
215 their putative presence in MV19, the genome was analyzed with the VFAnalyzer tool  
216 (<http://www.mgc.ac.cn/VFs/>), based on the VFDB database. As shown in [Suppl. Mat. Table S1](#),  
217 MV19 genome contains genes coding for the Non-hemolytic enterotoxin (*nheA*, *nheB*, *nheC*), the  
218 hemolytic enterotoxin (*hblA*, *hblC*, *hblD*), the single protein cytotoxin K (*cytK*) and the hemolysin  
219 Cereolysin O (*alo*). In addition, it contains genes for the Hemolysin III (*hlyIII*) and for a protein  
220 belonging to the Hemolysin-III family proteins, while a gene coding for the Hemolysin II (*hlyII*) was  
221 not found. MV19 genome contains only one of the genes required for Cereulide synthesis, *cesH*  
222 ([Suppl. Mat. Table S1](#)). The Cereulide biosynthetic genes are organized in a cluster of seven  
223 genes (*cesH*, *cesP*, *cesT*, *cesA*, *cesB*, *cesC*, and *cesD*) that are located on a megaplasmid. Six

224 genes form an operon (*cesPTABCD*) while the seventh (*cesH*) is transcribed by its own promoter  
225 and is located at the 5' end of the operon in the same reading frame (Lücking et al., 2015). In  
226 MV19 the *cesPTABCD* operon is not present while the single gene present (*cesH*) is found on the  
227 chromosome.

228 In addition, genes coding for virulence-related factors such as phospholipases, sphingomyelinases,  
229 proteinases and peptidases were also found in the MV19 genome (Suppl. Mat. Table S2). In  
230 particular, the MV19 genome contains two ORFs encoding the Immune Inhibitor A  
231 metalloproteinase (*inhA*), needed to escape the immune surveillance and promote germination  
232 inside the host (Enosi Tuipulotu et al., 2021), the Phosphatidylcholine-preferring phospholipase C  
233 (*plcA*), the Phosphatidylinositol-specific phospholipase C (*piplc*) and the Sphingomyelinase (*sph*),  
234 all involved in mammalian membrane-damaging (Suppl. Mat. Table S2). A gene coding for a  
235 homolog of the Streptococcal enolase (*eno*) was also found in the genome sequence of MV19  
236 (Suppl. Mat. Table S2). This is a secreted protein also found in different *B. anthracis* strains, where  
237 it may contribute to pathogenicity by binding the infected host's plasminogen (Lamonica et al,  
238 2005).

239 The ability to acquire iron is also considered a virulence-related factor, as it is crucial for bacterial  
240 growth and colonization of host tissues (Segond et al, 2014). Genes coding for two important  
241 siderophores useful for iron acquisition from ferritin, bacillibactin (*dhbABCEF*) and petrobactin  
242 (*asbABCDEF*), and the Iron-regulated leucine rich surface protein type A (*ilsA*), that acts as ferritin  
243 surface receptor, were all found in the MV19 genome (Suppl. Mat. Table S2).

244 Regulation of virulence gene expression occurs through a precise regulatory circuit, which in *B.*  
245 *cereus* is provided by a quorum sensing mechanism controlled by the transcriptional factor PlcR  
246 and the signalling peptide PapR (Ehling-Schulz et al., 2018). As shown in Suppl. Mat. Table S2,  
247 genes coding for their homologs are present in MV19 genome.

248 Altogether, MV19 contains genes for most known virulence factors of pathogenic *B. cereus* and  
249 should therefore be considered as a potentially virulent strain.

250

251 **3.3 Physiological characterization**

252 MV19 was isolated from a faecal sample of a healthy, four-year old boy not under antibiotic or  
253 probiotic treatment. The sample was heat-treated at 80°C for 20 minutes to eliminate all vegetative  
254 cells, plated on DSM and incubated aerobically to isolate *Bacillus* spore formers. Purified colonies  
255 appeared after 16-18 hours of incubation at 37°C and appeared creamy, mucoid and of irregular  
256 shape. Under the light microscope cells of MV19 were rod shaped and formed phase bright,  
257 ellipsoidal spores localized in central or sub-terminal position (respectively white or yellow arrows in  
258 [Fig. 3A](#)). In addition to spores, some MV19 cells also produced one or two phase bright structures  
259 per cell (red arrows in [Fig. 3B](#)). Production of such structures, resembling inclusion granules, was  
260 independent on the growth medium, being produced in rich (LB), minimal (S7) or sporulation-  
261 inducing (DS) media, and on the growth phase (not shown). Some forming spores ([Fig. 3C](#)) and  
262 free spore (white arrows in [Fig. 3D](#)) showed an unusual curved morphology (see below).

263 A panel of relevant antibiotics was used to assess the susceptibility of MV19 cells. As reported in  
264 [Table 2](#), MV19 cells showed MIC for vancomycin higher than the breakpoint levels indicated for  
265 members of the *Bacillus* genus ([Saggese et al. 2021](#)) and a weak resistance to streptomycin and  
266 chloramphenicol ([Table 2](#)).

267 MV19 cells were able to completely lyse red blood cells on plate and were, therefore, indicated as  
268  $\beta$ -hemolytic (not shown). Cells were able to grow in a temperature range between 20 and 44°C  
269 (not shown) and produced biofilm both on plate and on liquid cultures. The amount of biofilm  
270 formed was higher minimal (S7) than in rich (LB) or sporulation-inducing (DS) medium after 48  
271 hours of growth ([Fig. 4](#)). Genes putatively involved in biofilm formation were identified in the MV19  
272 genome ([Suppl. Mat. Table S3](#)). In particular, the *pur* genes, required for purine biosynthesis, the  
273 *eps* genes, coding for the exopolysaccharide, the *tapA* gene needed for biofilm assembly  
274 ([Vlamakis et al., 2013](#) and [Yan et al., 2017](#)), and the *sinR* gene coding for the master regulator of  
275 biofilm formation ([Yan et al., 2017](#)) were all present in the MV19 genome ([Suppl. Mat. Table S3](#)).

276 Cell growth was followed at 25, 37 and 42°C in LB medium. At 37 and 42°C the generation time  
277 was identical (33 min) while at 25°C was longer (50 min). Moreover, at 37 and 42°C cells very  
278 rapidly started their exponential growth and quickly entered into the stationary phase of growth. At  
279 25°C cells experienced a long lag phase, independently from the temperature used to obtain the

280 starting inoculum, before entering into the exponential phase of growth. Therefore, 37 and 42°C  
281 were considered as optimal growth temperatures and 25°C as a sub-optimal condition in LB  
282 medium. Based on this, all further experiments were performed at the optimal temperature of 42°C  
283 and at the sub-optimal temperature of 25°C.

284

### 285 **3.4 Sporulation and spore properties**

286 MV19 were grown in DSM to induce spore formation. As in LB also in DSM cells grew more rapidly  
287 at 42°C than at 25°C (Fig. 5A). At the latter temperature entry into the exponential phase of growth  
288 was preceded by a long lag phase and a precise initiation of the sporulation cycle (T<sub>0</sub>) was not  
289 clearly identified. Indeed, after 18 hours of growth at 25°C, during the exponential phase of growth,  
290 a large number of sporulating cells was already present (see below).

291 Spore formation was followed by collecting samples from the growth cultures at various times and  
292 counting vegetative cells, sporangia and free spores under the light microscope. As reported in  
293 Table 3, at 42°C few free spores (5%) were produced after 18 hours of growth. These became  
294 15% after 24 hours and after 42 hours only free spores were observed in the culture. At 25°C no  
295 free spores were observed after 18 and 24 hours and after 42 hours about 25% of sporangia were  
296 still present (Table 3). Spore production occurred more rapidly and efficiently at 42°C than at 25°C  
297 but at 25°C an over 15-fold higher number of spores was obtained ( $3.7 \times 10^8$  and  $60.0 \times 10^8$   
298 spores/ml at 25 and 42°C, respectively) (Fig. 5A). As previously reported for *B. subtilis*, a higher  
299 number of spores produced by slow- than fast-growing cells is due to a prolonged growth that  
300 allows for additional cell divisions (Mutlu et al., 2018) as also occurs for MV19 (Fig. 5A).

301 Spores produced at 25 or 42°C were then evaluated for their resistance properties and the  
302 germination efficiency. The efficiency of germination was assessed by plate count after suspension  
303 of purified spores in LB medium (Fig. 5B) and by flow cytometry (Fig. 5C and Suppl. Mat. Fig. S3),  
304 as previously described (Black et al., 2005; Cangiano et al., 2014). The two approaches gave  
305 similar results (Fig. 5BC) and indicated that spores produced at the sub-optimal temperature of  
306 25°C germinated more rapidly and efficiently than those produced at the optimal growth  
307 temperature.

308 Spores produced at the sub-optimal temperature were also more resistant than those produced at  
309 42°C to lysozyme (Fig. 6A), H<sub>2</sub>O<sub>2</sub> and heat (Fig. 6B) and were more hydrophobic (Fig. 6C). Due to  
310 the high hydrophobicity of 25°C spores, when suspended in water they tended to form clumps that  
311 precipitated to the bottom of the cuvette causing a decrease of OD<sub>590nm</sub> readings over time (Fig.  
312 6D). Such effect was not observed when spores were resuspended in 50% methanol (not shown),  
313 confirming that it was due to the spore hydrophobicity.

314

### 315 **3.5 Spore morphology**

316 Spore morphology appeared dependent on the growth temperature. Spores produced at the sub-  
317 optimal temperature (25°C) observed at the phase contrast microscope showed a regular and  
318 organized distribution (Fig. 7). All spores appeared phase bright, of elliptical shape and organized  
319 into shoulder-to-shoulder filaments (Fig. 7). Such organization was not observed when spores  
320 were produced at 42°C (Fig. 7). Since growing and sporulating cells produce more biofilm at 25  
321 than at 42°C (Fig. 4), such organized distribution of spores might depend on cells entering into  
322 sporulation while entrapped in the extracellular matrix. The released spores would then keep the  
323 organized distribution of the sporulating cells.

324 Some of the spores produced at 42°C showed an unusual curved morphology (see Fig. 3CD and  
325 yellow arrows in Fig. 7), that was never observed in 25°C spores. The unusual morphology was  
326 strictly dependent on the growth temperature with no curved spores at 25°C and increasing  
327 numbers of curved spores raising the growth temperature from 37 (not shown) to 42°C. Counting  
328 over 300 spores in different microscopy fields, at 42°C about 30% of the spores showed the  
329 unusual morphology.

330 To further characterize the unusual morphology, purified spores were used for scanning electron  
331 microscopy analysis. As shown in Fig. 8, 25°C but not 42°C spores were enveloped into a matrix,  
332 supporting the hypothesis that such a matrix could be responsible for the organized spore  
333 distribution at 25°C observed in Fig. 7. In addition, the surface of spores appeared smooth at 25°C  
334 and wringled at 42°C (Fig. 8), suggesting that the wringled surface may be linked to the curved  
335 morphology.

336 The unusual spore morphology observed at 42°C could be dependent on the assembly of the  
337 spore coat and exosporium proteins. The MV19 genome was analyzed for the presence of  
338 homologs of coat/exosporium genes by using as a “query” the list of the spore coat and  
339 exosporium proteins identified in the *B. cereus* reference strain ATCC 14579 (Abhyankar *et al.*  
340 2013). As reported in the [Suppl. Mat. Table S4](#), the majority of the putative MV19 proteins showed  
341 a high similarity with homologs of the type strain *B. cereus* ATCC 14579. Six proteins of the  
342 reference strain (BC\_0944, BC\_2426, BC\_2427, BC\_2569, BC\_3515, BC\_p0002) were not found  
343 in MV19 ([Suppl. Mat. Table S4](#)). These proteins are not characterized with the exception of  
344 BC\_2569 annotated as “collagen triple helix repeats” and of BC\_p0002 located on a plasmid of  
345 strain ATCC 14579.

346

#### 347 **4. Conclusions**

348 MV19 is a human intestinal isolated strain belonging to the *B. cereus sensu stricto* species. Its  
349 genome contains genes coding for most known toxins and virulence-related factors of *B. cereus*  
350 with the exception of the genes required for Cereulide synthesis.

351 MV19 cells grow within a temperature range of 20 and 44°C with optimal growth at 37 and 42°C. At  
352 the optimal growth temperature of 42°C also spore production is faster than at the sub-optimal  
353 temperature of 25°C. However, the slow and prolonged growth at 25°C delayed the entry into  
354 sporulation allowing more cell divisions and the production of over 15-fold more free spores than at  
355 42°C. The 25°C spores are also more resistant (to lysozyme, H<sub>2</sub>O<sub>2</sub> and heat), more efficient in  
356 germination and more hydrophobic than those produced at 42°C. In addition, about 30% of the  
357 spores produced by fast growing cells showed an unusual curved morphology and a wringled  
358 surface, suggesting a defective structure that presumably affects the spore traits. Therefore,  
359 although at the optimal growth temperature of 42°C spore formation occurs faster and with a high  
360 efficiency, some of the produced spores are structurally and functionally defective. This conclusion  
361 suggests that the reduced rapidity and efficiency of sporulation at 25°C are compensated by a high  
362 quality and quantity of the released spores.

363 In *B. subtilis* a delay in spore formation negatively affects spore germination but increases the  
364 amount of spores produced and a quality-quantity trade-off has been proposed to occur and  
365 contribute to the evolutionary adaptation of spore formers (Mutlu et al., 2018; Mutlu et al., 2020). In  
366 *B. cereus* MV19 at the sub-optimal temperature of growth and sporulation more cells and more  
367 fully functional spores are produced than at the optimal growth temperature, compensating the  
368 faster growth and efficient sporulation observed at 42°C.

369 Although the molecular mechanisms regulating such balancing are totally obscure, some spore  
370 quality determinants have been proposed in *B. subtilis*. Examples are the electrical polarization of  
371 the outer membrane of developing spores (Sirec et al., 2019), the enzyme alanine dehydrogenase  
372 (Mutlu et al., 2018) and the isoleucyl-tRNA synthase (Kermgard et al., 2017) have all been  
373 proposed as quality control checkpoints. Homologs of both the alanine dehydrogenase  
374 (MV19\_2153) and the isoleucyl-tRNA synthase (MV19\_0519) are present in the MV19 genome  
375 and share, respectively, 72% and 73.86% of identity with the *B. subtilis* proteins. Addressing the  
376 role of these spore quality determinants in *B. cereus* would be a relevant future research  
377 challenge.

**Funding:** This work was in part supported by the Federico II University of Naples (Ricerca di Dipartimentale to L.B., R.I. and E.R.). M.V. and G.D.G.B. were supported by PhD fellowships of the Doctoral programme in Biology of the Federico II University of Naples.

### **Conflict of interest**

The authors declare no competing interests.

### **Acknowledgements**

The authors thank the electron microscopy facility (CESMA) of the Federico II University of Naples for their support with the SEM analysis.

### **Author agreement**

Authors approve the final version of the submitted manuscript.

### **Authors' contributions**

AS, GDGB, SC and MV executed the experiments, AS, MV, SC, LB, RI and ER analyzed the data, interpreted the results. ER and AS wrote the manuscript, ER, RI and LB designed the study and provided the funding.



## References

- Abee, T., Groot, M.N., Tempelaars, M., Zwietering, M., Moezelaar, R., van der Voort, M., 2011. Germination and outgrowth of spores of *Bacillus cereus* group members: diversity and role of germinant receptors. *Food Microbiol* 28, 199–208. <https://doi.org/10.1016/j.fm.2010.03.015>
- Abhyankar, W., Hossain, A.H., Djajasaputra, A., Permpoonpattana, P., Ter Beek, A., Dekker, H.L., Cutting, S.M., Brul, S., de Koning, L.J., de Koster, C.G., 2013. In pursuit of protein targets: proteomic characterization of bacterial spore outer layers. *J Proteome Res* 12, 4507–4521. <https://doi.org/10.1021/pr4005629>
- Andersson, A., Ronner, U., Granum, P.E., 1995. What problems does the food industry have with the spore-forming pathogens *Bacillus cereus* and *Clostridium perfringens*? *Int J Food Microbiol* 28, 145–155. [https://doi.org/10.1016/0168-1605\(95\)00053-4](https://doi.org/10.1016/0168-1605(95)00053-4)
- Bianco, A., Capozzi, L., Monno, M.R., Del Sambro, L., Manzulli, V., Pesole, G., Loconsole, D., Parisi, A., 2020. Characterization of *Bacillus cereus* Group Isolates From Human Bacteremia by Whole-Genome Sequencing. *Front Microbiol* 11, 599524. <https://doi.org/10.3389/fmicb.2020.599524>
- Black, E.P., Koziol-Dube, K., Guan, D., Wei, J., Setlow, B., Cortezzo, D.E., Hoover, D.G., Setlow, P., 2005a. Factors influencing germination of *Bacillus subtilis* spores via activation of nutrient receptors by high pressure. *Appl Environ Microbiol* 71, 5879–5887. <https://doi.org/10.1128/AEM.71.10.5879-5887.2005>
- Black, E.P., Koziol-Dube, K., Guan, D., Wei, J., Setlow, B., Cortezzo, D.E., Hoover, D.G., Setlow, P., 2005b. Factors influencing germination of *Bacillus subtilis* spores via activation of nutrient receptors by high pressure. *Appl Environ Microbiol* 71, 5879–5887. <https://doi.org/10.1128/AEM.71.10.5879-5887.2005>
- Bressuire-Isoard, C., Bornard, I., Henriques, A.O., Carlin, F., Broussolle, V., 2016. Sporulation Temperature Reveals a Requirement for CotE in the Assembly of both the Coat and Exosporium Layers of *Bacillus cereus* Spores. *Appl Environ Microbiol* 82, 232–243. <https://doi.org/10.1128/AEM.02626-15>
- Cangiano, G., Sirec, T., Panarella, C., Isticato, R., Baccigalupi, L., De Felice, M., Ricca, E., 2014. The *sps* Gene Products Affect the Germination, Hydrophobicity, and Protein Adsorption of *Bacillus subtilis* Spores. *Appl Environ Microbiol* 80, 7293–7302. <https://doi.org/10.1128/AEM.02893-14>
- Carroll, L.M., Cheng, R.A., Wiedmann, M., Kovac, J., 2021. Keeping up with the *Bacillus cereus* group: taxonomy through the genomics era and beyond. *Crit Rev Food Sci Nutr* 1–26. <https://doi.org/10.1080/10408398.2021.1916735>
- Chaumeil, P.-A., Mussig, A.J., Hugenholtz, P., Parks, D.H., 2019. GTDB-Tk: a toolkit to classify genomes with the Genome Taxonomy Database. *Bioinformatics* btz848. <https://doi.org/10.1093/bioinformatics/btz848>
- Enosi Tuipulotu, D., Mathur, A., Ngo, C., Man, S.M., 2021. *Bacillus cereus*: Epidemiology, Virulence Factors, and Host-Pathogen Interactions. *Trends Microbiol* 29, 458–471. <https://doi.org/10.1016/j.tim.2020.09.003>
- Ehling-Schulz, M., Lereclus, D., Koehler, T.M., 2019. The *Bacillus cereus* Group: *Bacillus* Species with Pathogenic Potential. *Microbiol Spectr* 7. <https://doi.org/10.1128/microbiolspec.GPP3-0032-2018>
- Faille, C., Bénézech, T., Midelet-Bourdin, G., Lequette, Y., Clarisse, M., Ronse, G., Ronse, A., Slomianny, C., 2014. Sporulation of *Bacillus* spp. within biofilms: a potential

source of contamination in food processing environments. *Food Microbiol* 40, 64–74. <https://doi.org/10.1016/j.fm.2013.12.004>

- Glasset, B., Herbin, S., Guillier, L., Cadel-Six, S., Vignaud, M.-L., Grout, J., Pairaud, S., Michel, V., Hennekinne, J.-A., Ramarao, N., Brisabois, A., 2016. *Bacillus cereus*-induced food-borne outbreaks in France, 2007 to 2014: epidemiology and genetic characterisation. *Euro Surveill* 21, 30413. <https://doi.org/10.2807/1560-7917.ES.2016.21.48.30413>
- Harwood, C.R., Cutting, S.M., 1990. *Molecular biological methods for Bacillus*. Wiley, Chichester; New York.
- Huang, Y., Flint, S.H., Palmer, J.S., 2020. *Bacillus cereus* spores and toxins - The potential role of biofilms. *Food Microbiol* 90, 103493. <https://doi.org/10.1016/j.fm.2020.103493>
- Husmark, U., Rönner, U., 1992. The influence of hydrophobic, electrostatic and morphologic properties on the adhesion of *Bacillus spores*. *Biofouling* 5, 335–344. <https://doi.org/10.1080/08927019209378253>
- Isticato, R., Lanzilli, M., Petrillo, C., Donadio, G., Baccigalupi, L., Ricca, E., 2020. *Bacillus subtilis* builds structurally and functionally different spores in response to the temperature of growth. *Environ Microbiol* 22, 170–182. <https://doi.org/10.1111/1462-2920.14835>
- Jovanovic, J., Ornelis, V.F.M., Madder, A., Rajkovic, A., 2021. *Bacillus cereus* food intoxication and toxicoinfection. *Compr Rev Food Sci Food Saf* 20, 3719–3761. <https://doi.org/10.1111/1541-4337.12785>
- Karunakaran, E., Biggs, C.A., 2011. Mechanisms of *Bacillus cereus* biofilm formation: an investigation of the physicochemical characteristics of cell surfaces and extracellular proteins. *Appl Microbiol Biotechnol* 89, 1161–1175. <https://doi.org/10.1007/s00253-010-2919-2>
- Kermgard, E., Yang, Z., Michel, A.-M., Simari, R., Wong, J., Ibba, M., Lazazzera, B.A., 2017. Quality Control by Isoleucyl-tRNA Synthetase of *Bacillus subtilis* Is Required for Efficient Sporulation. *Sci Rep* 7, 41763. <https://doi.org/10.1038/srep41763>
- Lamonica, J.M., Wagner, M., Eschenbrenner, M., Williams, L.E., Miller, T.L., Patra, G., DelVecchio, V.G., 2005. Comparative secretome analyses of three *Bacillus anthracis* strains with variant plasmid contents. *Infect Immun* 73, 3646–3658. <https://doi.org/10.1128/IAI.73.6.3646-3658.2005>
- Lin, Y., Briandet, R., Kovács, Á.T., 2022. *Bacillus cereus* sensu lato biofilm formation and its ecological importance. *Biofilm* 4, 100070. <https://doi.org/10.1016/j.biofilm.2022.100070>
- Liu, B., Zheng, D., Jin, Q., Chen, L., Yang, J., 2019. VFDB 2019: a comparative pathogenomic platform with an interactive web interface. *Nucleic Acids Res* 47, D687–D692. <https://doi.org/10.1093/nar/gky1080>
- Liu, Y., Du, J., Lai, Q., Zeng, R., Ye, D., Xu, J., Shao, Z., 2017. Proposal of nine novel species of the *Bacillus cereus* group. *Int J Syst Evol Microbiol* 67, 2499–2508. <https://doi.org/10.1099/ijsem.0.001821>
- Liu, Y., Lai, Q., Göker, M., Meier-Kolthoff, J.P., Wang, M., Sun, Y., Wang, L., Shao, Z., 2015. Genomic insights into the taxonomic status of the *Bacillus cereus* group. *Sci Rep* 5, 14082. <https://doi.org/10.1038/srep14082>
- Lücking, G., Frenzel, E., Rüttschle, A., Marxen, S., Stark, T.D., Hofmann, T., Scherer, S., Ehling-Schulz, M., 2015. Ces locus embedded proteins control the non-ribosomal

- synthesis of the cereulide toxin in emetic *Bacillus cereus* on multiple levels. *Front Microbiol* 6, 1101. <https://doi.org/10.3389/fmicb.2015.01101>
- Lugli, G.A., Milani, C., Mancabelli, L., van Sinderen, D., Ventura, M., 2016. MEGAnnotator: a user-friendly pipeline for microbial genomes assembly and annotation. *FEMS Microbiol Lett* 363, fnw049. <https://doi.org/10.1093/femsle/fnw049>
  - McKenney, P.T., Driks, A., Eichenberger, P., 2013. The *Bacillus subtilis* endospore: assembly and functions of the multilayered coat. *Nat Rev Microbiol* 11, 33–44. <https://doi.org/10.1038/nrmicro2921>
  - Messelhäußer, U., Ehling-Schulz, M., 2018. *Bacillus cereus*—a Multifaceted Opportunistic Pathogen. *Curr Clin Micro Rpt* 5, 120–125. <https://doi.org/10.1007/s40588-018-0095-9>
  - Mutlu, A., Kaspar, C., Becker, N., Bischofs, I.B., 2020. A spore quality-quantity tradeoff favors diverse sporulation strategies in *Bacillus subtilis*. *ISME J* 14, 2703–2714. <https://doi.org/10.1038/s41396-020-0721-4>
  - Mutlu, A., Trauth, S., Ziesack, M., Nagler, K., Bergeest, J.-P., Rohr, K., Becker, N., Höfer, T., Bischofs, I.B., 2018. Phenotypic memory in *Bacillus subtilis* links dormancy entry and exit by a spore quantity-quality tradeoff. *Nat Commun* 9, 69. <https://doi.org/10.1038/s41467-017-02477-1>
  - Nicholson, W.L., Setlow, P., 1990. Sporulation, germination and outgrowth. In *Molecular Biological Methods for Bacillus*. John Wiley and Sons, Chichester, England.
  - Owusu-Kwarteng, J., Wuni, A., Akabanda, F., Tano-Debrah, K., Jespersen, L., 2017. Prevalence, virulence factor genes and antibiotic resistance of *Bacillus cereus* sensu lato isolated from dairy farms and traditional dairy products. *BMC Microbiol* 17, 65. <https://doi.org/10.1186/s12866-017-0975-9>
  - Petrillo, C., Castaldi, S., Lanzilli, M., Ricca, E., Istatico, R. 2020. The temperature of growth and sporulation modulates the efficiency of spore-display in *Bacillus subtilis*. *Microbial Cell Factories* 19(1), 185. <https://doi.org/10.1186/s12934-020-01446-6>.
  - Petrillo, C., Castaldi, S., Lanzilli, M., Selci, M., Cordone, A., Giovannelli, D., Istatico, R., 2021. Genomic and Physiological Characterization of Bacilli Isolated From Salt-Pans With Plant Growth Promoting Features. *Front Microbiol* 12, 715678. <https://doi.org/10.3389/fmicb.2021.715678>
  - Ryu, J.-H., Beuchat, L.R., 2005. Biofilm formation and sporulation by *Bacillus cereus* on a stainless steel surface and subsequent resistance of vegetative cells and spores to chlorine, chlorine dioxide, and a peroxyacetic acid-based sanitizer. *J Food Prot* 68, 2614–2622. <https://doi.org/10.4315/0362-028x-68.12.2614>
  - Saggese, A., Baccigalupi, L., Ricca, E., 2021. Spore Formers as Beneficial Microbes for Humans and Animals. *Applied Microbiology* 1, 498–509. <https://doi.org/10.3390/applmicrobiol1030032>
  - Saggese, A., De Luca, Y., Baccigalupi, L., Ricca, E., 2022. An antimicrobial peptide specifically active against *Listeria monocytogenes* is secreted by *Bacillus pumilus* SF214. *BMC Microbiol* 22, 3. <https://doi.org/10.1186/s12866-021-02422-9>
  - Segond, D., Abi Khalil, E., Buisson, C., Daou, N., Kallassy, M., Lereclus, D., Arosio, P., Bou-Abdallah, F., Nielsen Le Roux, C., 2014. Iron acquisition in *Bacillus cereus*: the roles of IIsA and bacillibactin in exogenous ferritin iron mobilization. *PLoS Pathog* 10, e1003935. <https://doi.org/10.1371/journal.ppat.1003935>
  - Sirec, T., Benarroch, J.M., Buffard, P., Garcia-Ojalvo, J., Asally, M., 2019. Electrical Polarization Enables Integrative Quality Control during Bacterial Differentiation into Spores. *iScience* 16, 378–389. <https://doi.org/10.1016/j.isci.2019.05.044>

- Tauveron, G., Slomianny, C., Henry, C., Faille, C., 2006. Variability among *Bacillus cereus* strains in spore surface properties and influence on their ability to contaminate food surface equipment. *Int J Food Microbiol* 110, 254–262. <https://doi.org/10.1016/j.ijfoodmicro.2006.04.027>
- van der Voort, M., Abee, T., 2009. Transcriptional regulation of metabolic pathways, alternative respiration and enterotoxin genes in anaerobic growth of *Bacillus cereus* ATCC 14579. *J Appl Microbiol* 107, 795–804. <https://doi.org/10.1111/j.1365-2672.2009.04252.x>
- Vlamakis, H., Chai, Y., Beaugerard, P., Losick, R., Kolter, R., 2013. Sticking together: building a biofilm the *Bacillus subtilis* way. *Nat Rev Microbiol* 11, 157–168. <https://doi.org/10.1038/nrmicro2960>
- Wagner, M., Ivleva, N.P., Haisch, C., Niessner, R., Horn, H., 2009. Combined use of confocal laser scanning microscopy (CLSM) and Raman microscopy (RM): investigations on EPS-Matrix. *Water Res* 43, 63–76. <https://doi.org/10.1016/j.watres.2008.10.034>
- Wijman, J.G.E., de Leeuw, P.P.L.A., Moezelaar, R., Zwietering, M.H., Abee, T., 2007. Air-liquid interface biofilms of *Bacillus cereus*: formation, sporulation, and dispersion. *Appl Environ Microbiol* 73, 1481–1488. <https://doi.org/10.1128/AEM.01781-06>
- Xu Zhou, K., Wisnivesky, F., Wilson, D.I., Christie, G., 2017. Effects of culture conditions on the size, morphology and wet density of spores of *Bacillus cereus* 569 and *Bacillus megaterium* QM B1551. *Lett Appl Microbiol* 65, 50–56. <https://doi.org/10.1111/lam.12745>
- Yan, F., Yu, Y., Gozzi, K., Chen, Y., Guo, J.-H., Chai, Y., 2017. Genome-Wide Investigation of Biofilm Formation in *Bacillus cereus*. *Appl Environ Microbiol* 83, e00561-17. <https://doi.org/10.1128/AEM.00561-17>
- Zhao, J., Krishna, V.B., Moudgil, B., Koopman, B., 2008. Evaluation of endospore purification methods applied to *Bacillus cereus*. <https://doi.org/10.1016/J.SEPPUR.2007.11.002>

**Table 1.** Genome properties of MV19

| Species                | Size (bp) | Contigs | GC content (%) | Predicted ORFs |
|------------------------|-----------|---------|----------------|----------------|
| <i>Bacillus cereus</i> | 5.792.430 | 98      | 35             | 5803           |

**Table 2.** Minimal Inhibitory Concentration (MIC)<sup>a</sup> of selected antibiotics against MV19

| Antibiotic      | <i>B. cereus</i> MV19 <sup>b</sup> | <i>Bacillus</i> EFSA breakpoint <sup>b</sup> |
|-----------------|------------------------------------|----------------------------------------------|
| Vancomycin      | 12.00                              | 4                                            |
| Clindamycin     | 0.25                               | 4                                            |
| Gentamicin      | 0.38                               | 4                                            |
| Erythromycin    | 0.38                               | 4                                            |
| Streptomycin    | 2.00                               | 8                                            |
| Tetracycline    | 0.25                               | 8                                            |
| Chloramphenicol | 4.00                               | 8                                            |
| Kanamycin       | 1.50                               | 8                                            |

<sup>a</sup> Analysis performed with paper strips with a concentration range of 0.016-256  $\mu\text{g mL}^{-1}$  for all the antibiotics tested; <sup>b</sup> values in  $\mu\text{g mL}^{-1}$ .

**Table 3.** Efficiency of spore formation at 25 and 42°C<sup>a</sup>.

| Temperature | Hours | Vegetative cells (%) | Sporangia (%) | Free spores (%) |
|-------------|-------|----------------------|---------------|-----------------|
| <b>25°C</b> | 0     | 100                  | -             | -               |
|             | 18    | 50                   | 50            | -               |
|             | 24    | -                    | 100           | -               |
|             | 42    | -                    | 25            | 75              |
| <b>42°C</b> | 0     | 100                  | -             | -               |
|             | 18    | 20                   | 75            | 5               |
|             | 24    | 15                   | 70            | 15              |
|             | 42    | -                    | -             | 100             |

<sup>a</sup>Cells were grown aerobically in DS medium. At the indicated times aliquots were collected and analyzed under the light microscope. The % of vegetative cells, sporangia and free spores was calculated by counting over 300 bacteria in different microscopy fields.

## Figure legends

**Fig. 1:** The circles represent from inside to outside: circle 1, DNA base position (bp); circle 2 and 3, GC content and GC skew; circle 4 protein-coding regions transcribed on the plus strand (clockwise); circle 5, protein-coding regions transcribed on the minus strand (anticlockwise). The genome plot was generated using Proksee.

**Fig. 2:** The phylogenetic tree was constructed using the Maximum likelihood algorithm with model GTR + I + G4, based on 16S rRNA gene sequences. The genome sequence of MV19 was aligned to the type strains of the "*Bacillus cereus* group" according to Genome Taxonomy Database (GTDB). Node support represents the approximate likelihood-ratio test (aLRT) and is shown at the corresponding node of the tree. *Bacillus subtilis* strain 168 is used as an outgroup.

**Fig.3:** Cells of MV19 grown on solid DSM at 42°C and observed under the phase-contrast microscope. (A) Within sporangia spores have central (white arrows) or sub-terminal (yellow arrows) position. (B) Some cells contain phase bright structures (red arrows) resembling inclusion granules. Some forming spores (C) and free spore (D, white arrow) showed an unusual curved morphology. Scale bars correspond to 1 µm.

**Fig. 4:** Biofilm production in minimal (S7), rich (LB) and sporulation-inducing (DS) medium at 25°C. The graph shows the OD<sub>570nm</sub> values of the samples stained with crystal violet. The graph reports the average of three independent experiments.

**Fig.5:** MV19 growth at 25°C (blue) or 42°C (orange) in sporulation-inducing medium (A). Germination efficiency measured by CFU counts (B) or flow cytometry (C) with spores produced at 25 (blue ) and 42 °C (orange). Panel C reports the percentage of germination based on the flow cytometry data (Supplementary material Fig. S3).

**Fig. 6** Physiological properties of MV19 spores produced at 25 (blue) and 42°C (orange). A) Lysozyme resistance assay. Percentage of resistant spores after 1 h of incubation with 7 U · ml<sup>-1</sup> of lysozyme (sigma). B) Heat and hydrogen peroxide resistance assay. Percentage of resistant spores exposed for 7.5, 15 and 30 minutes at 90°C (filled symbols) or with 5% H<sub>2</sub>O<sub>2</sub> (vol/vol) (open symbols) are shown. C) Hydrophobicity assay. The percentage of hydrophobicity represents the proportion (×100) of spores in n-hexadecane after the separation of the spores into water and solvent phases. D) Clumping assay of spores produced at 25 (blue) and 42°C (orange). The percentage of OD580nm decrease of spores suspended in distilled water was monitored for 15 minutes.

**Fig. 7:** Morphology of spores produced at 25 and 42°C observed by phase-contrast microscopy. Arrows indicate the curved spores observed at the 42°C. For all panels the scale bar corresponds to 1µm.

**Fig. 8:** Scanning electron microscopy analysis of spores produced at the two different temperatures (25 and 42°C). Scale bar 1µm.



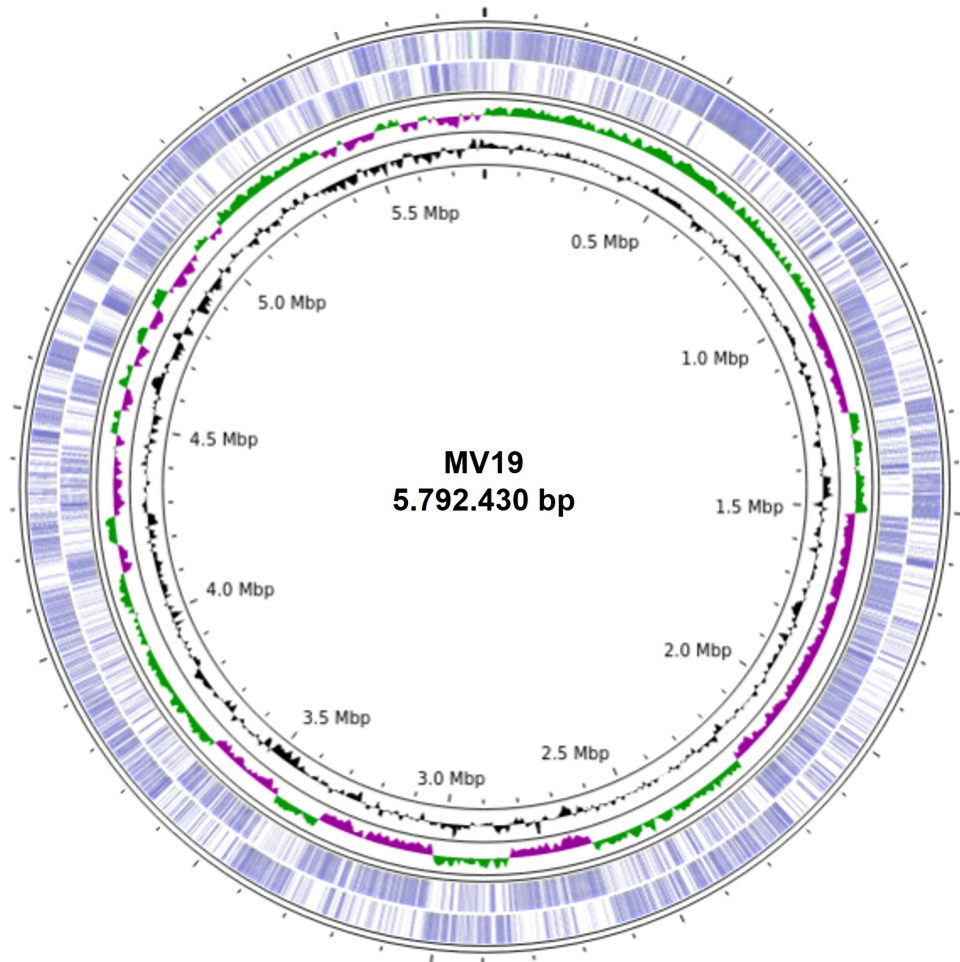

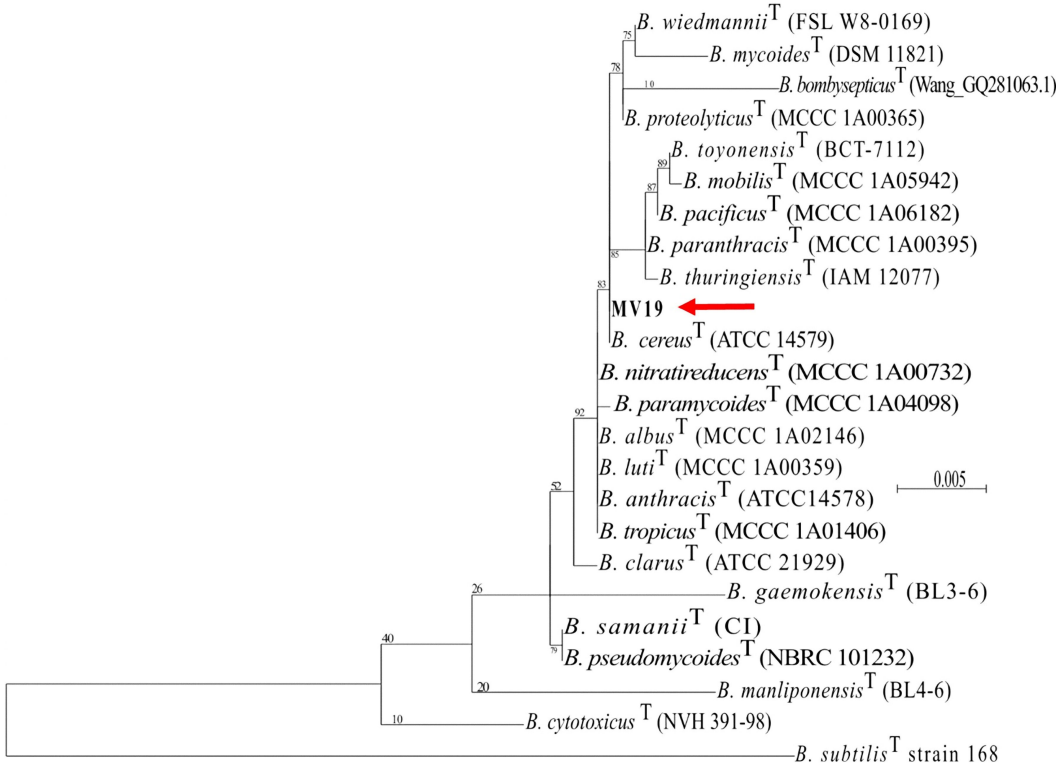

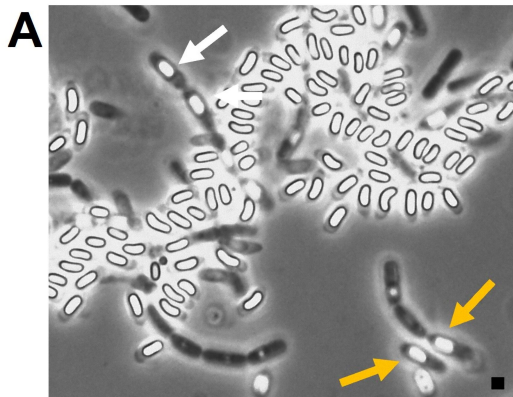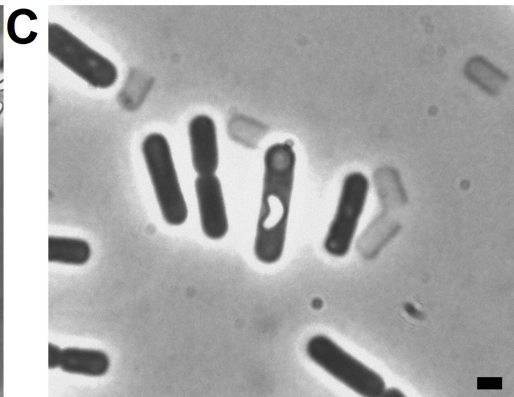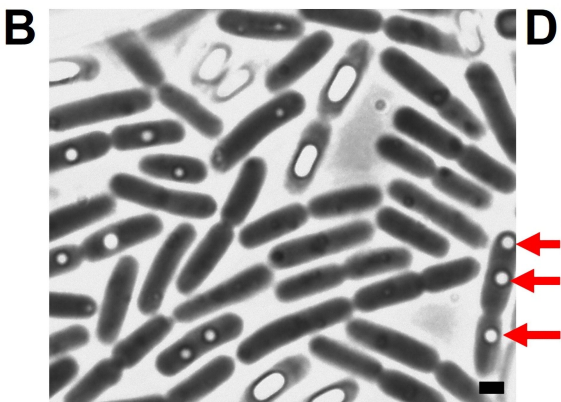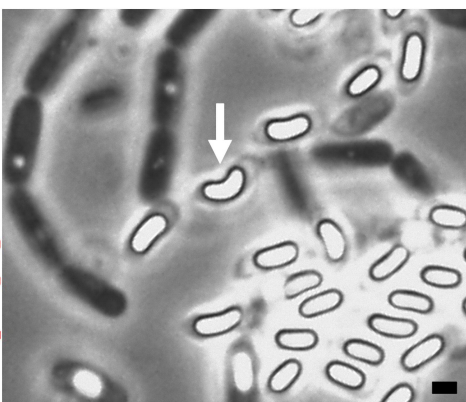

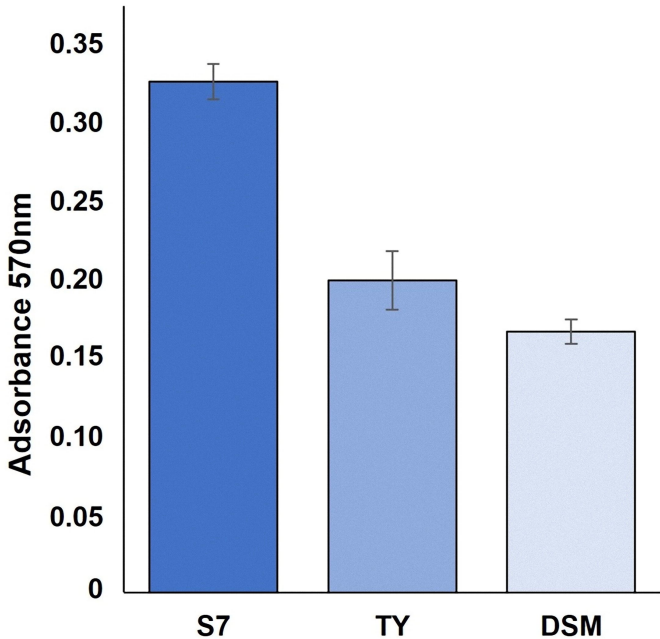

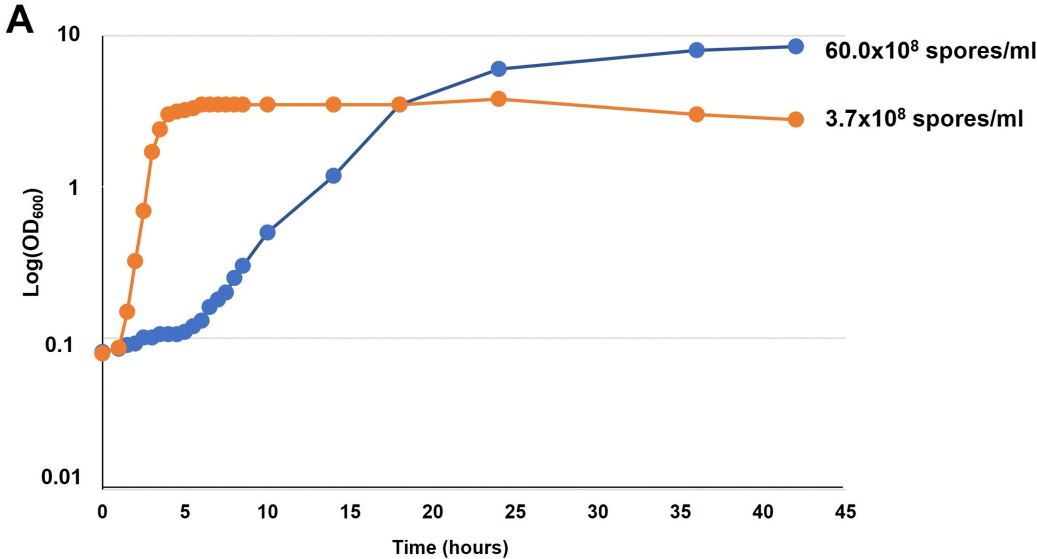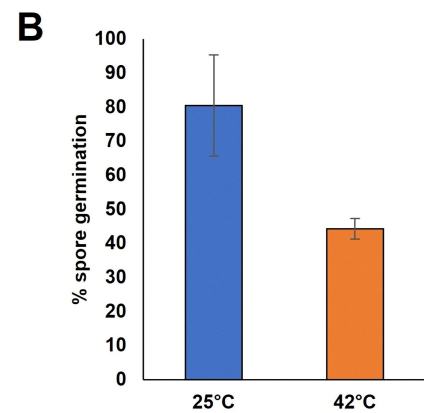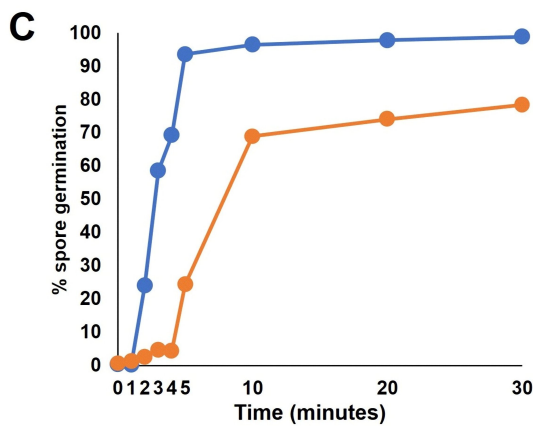

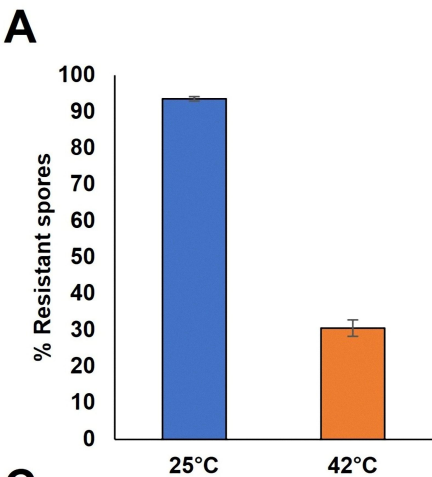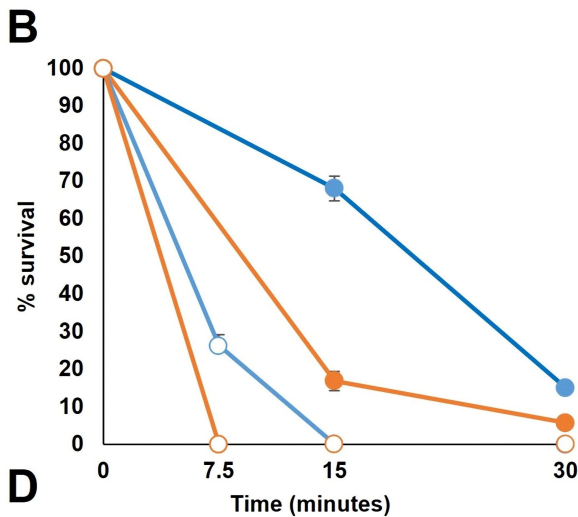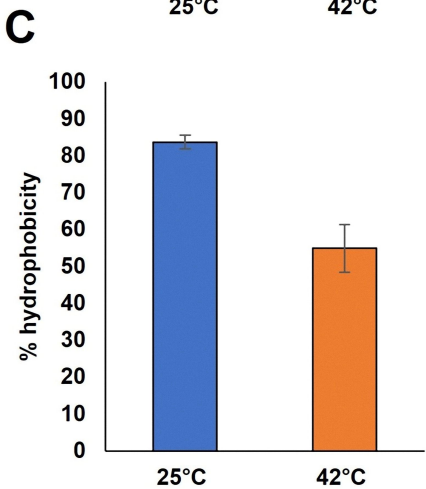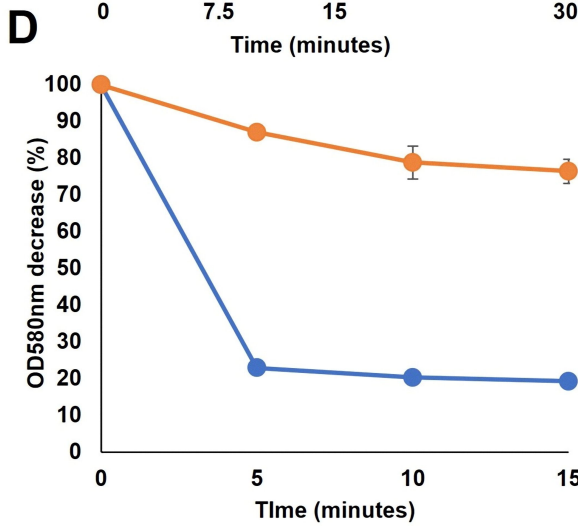

**25°C**

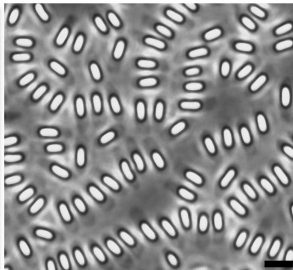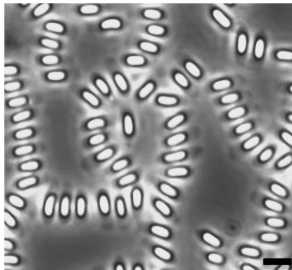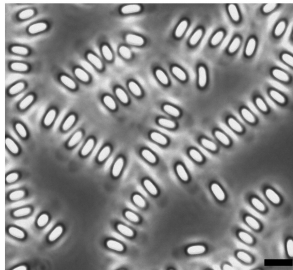

**42°C**

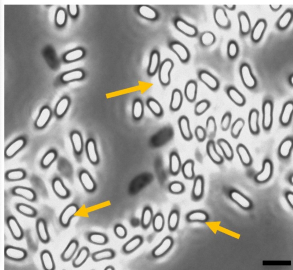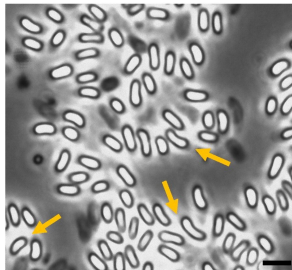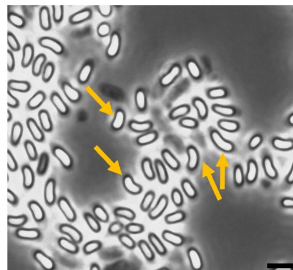

**25°C**

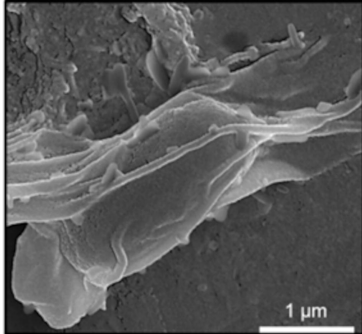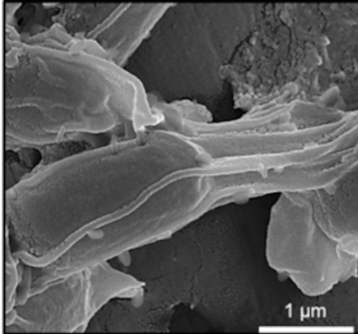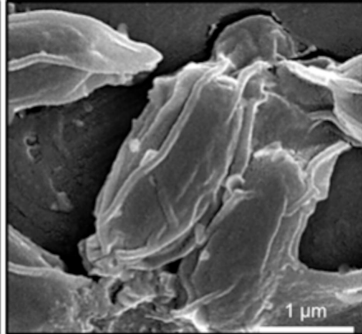

**42°C**

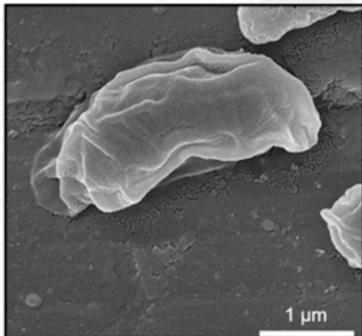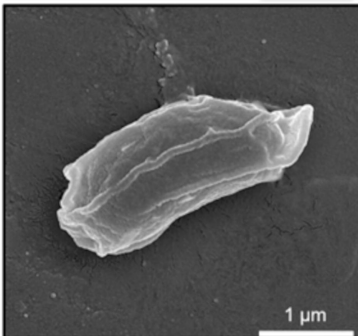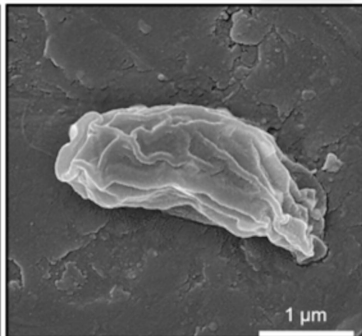

Source: http://biorxiv.org/content/10.1101/2022.06.22.497182v1.full.pdf
